# Supplementary material for: Aluminatesulfonic acid nanoparticles: synthesis, characterization and application as a new and recyclable nanocatalyst for the Biginelli and Biginelli-like condensations
Source: Royal Society of Chemistry journal article supplement (doi:10.1039/c5ra01406a), 2015-01-01

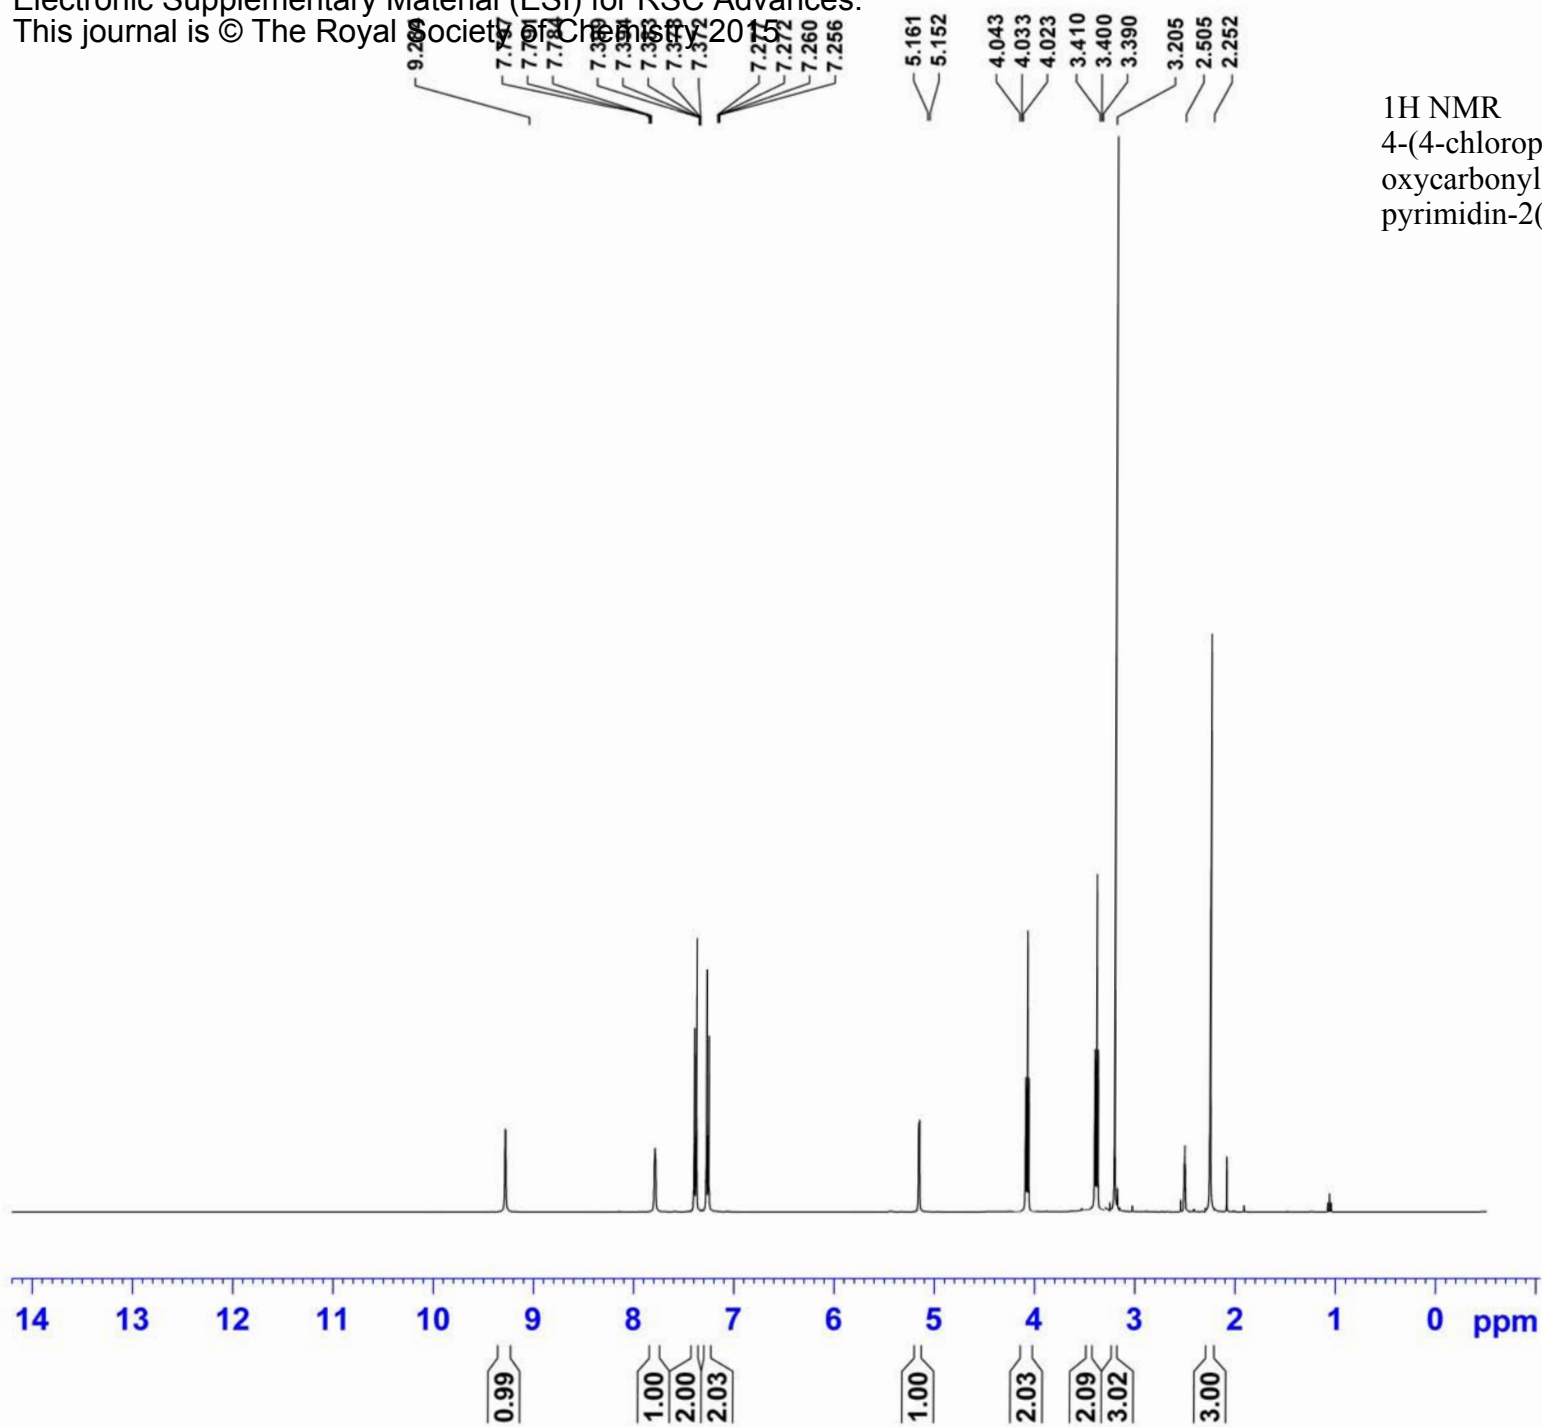

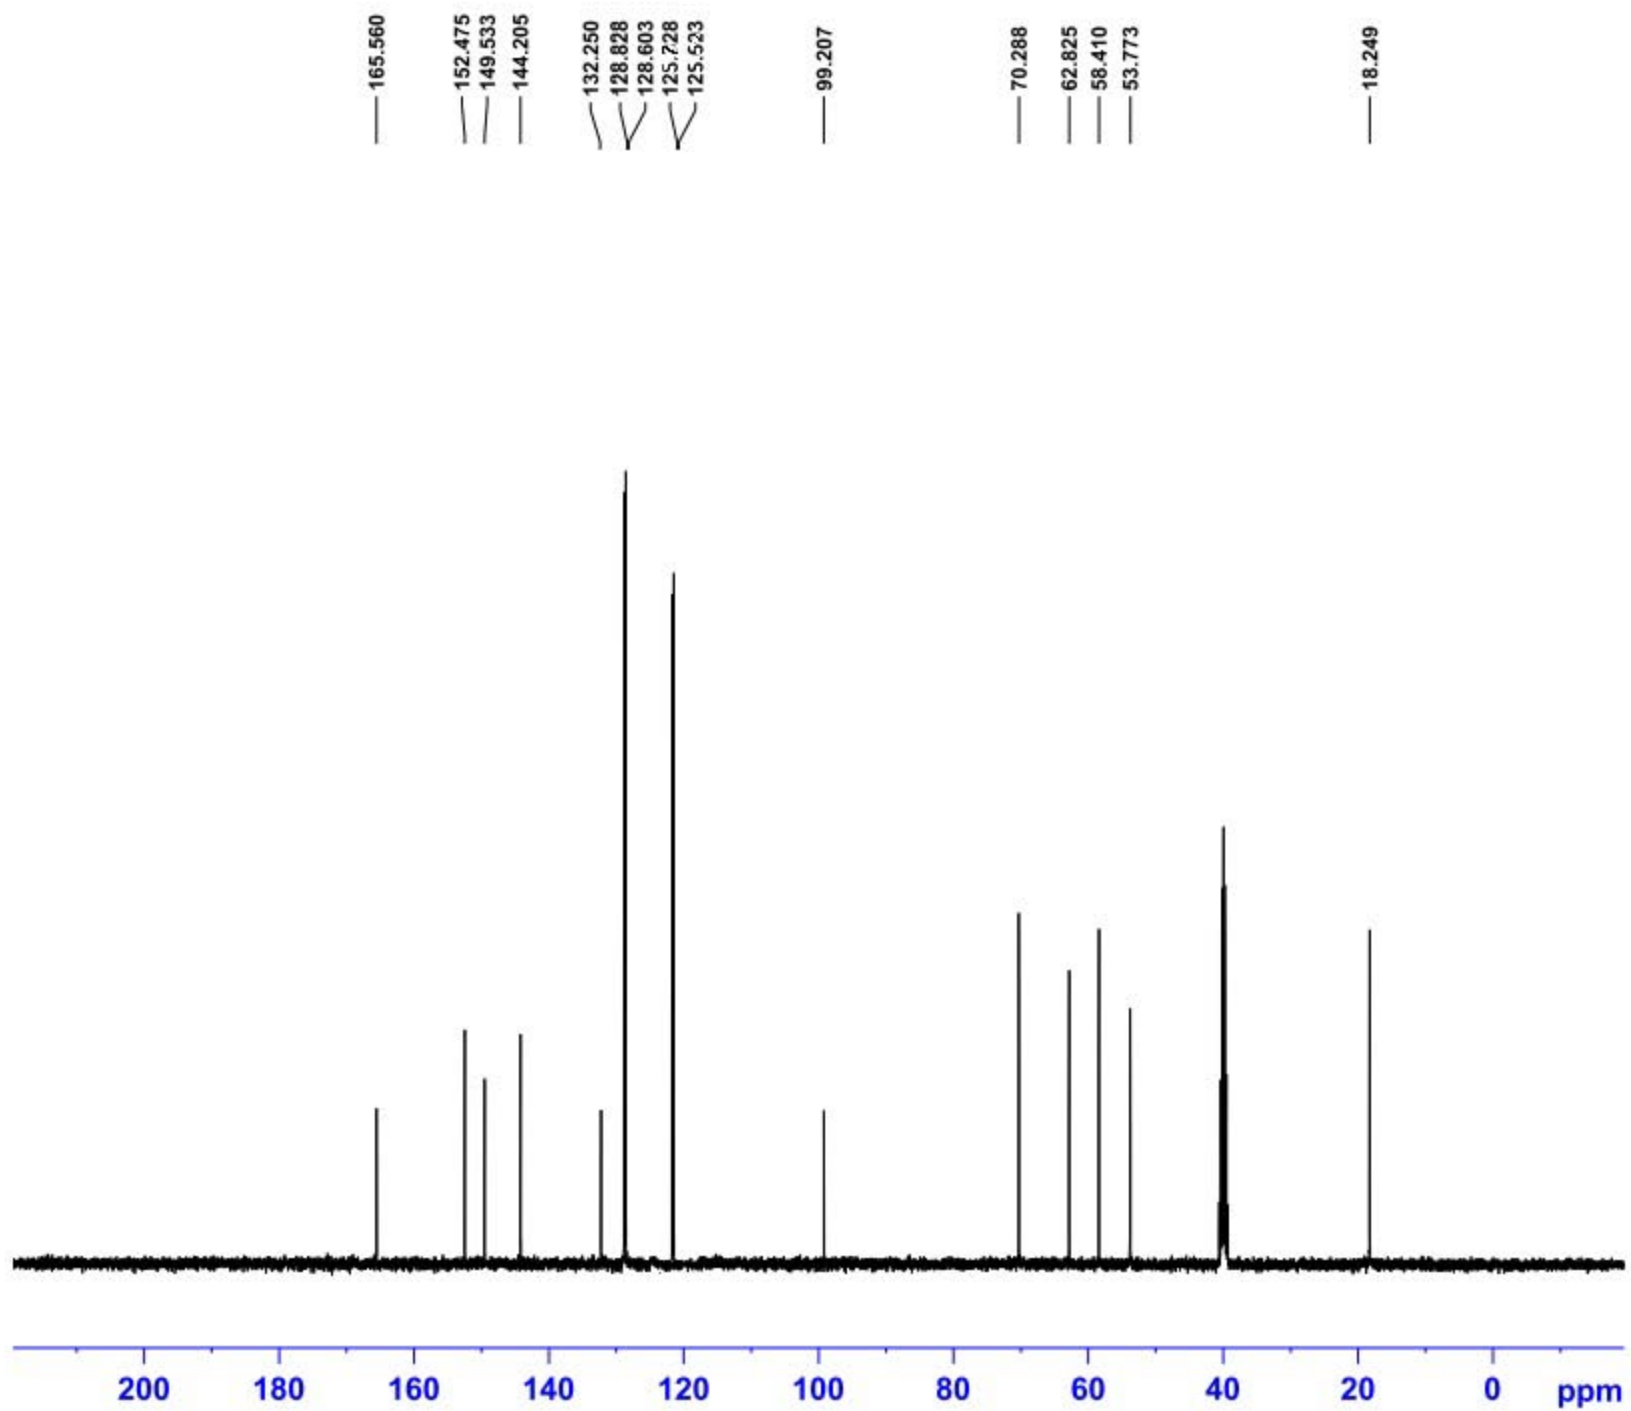

13C NMR  
4-(4-chlorophenyl)-5-(2-methoxyethoxycarbonyl)-6-methyl-3,4-dihydropyrimidin-2(1H)-one (14u)

11.361  
11.140

9.250

8.400

7.644

7.624

7.103

7.030

7.009

4.880

3.372

2.505

2.313

2.283

### <sup>1</sup>H NMR

5,6,7,8-Tetrahydro-5-(2,4-dimethylphenyl)-7-thioxopyrimido[4,5-d]pyrimidine-2,4(1H,3H)-dione (16d)

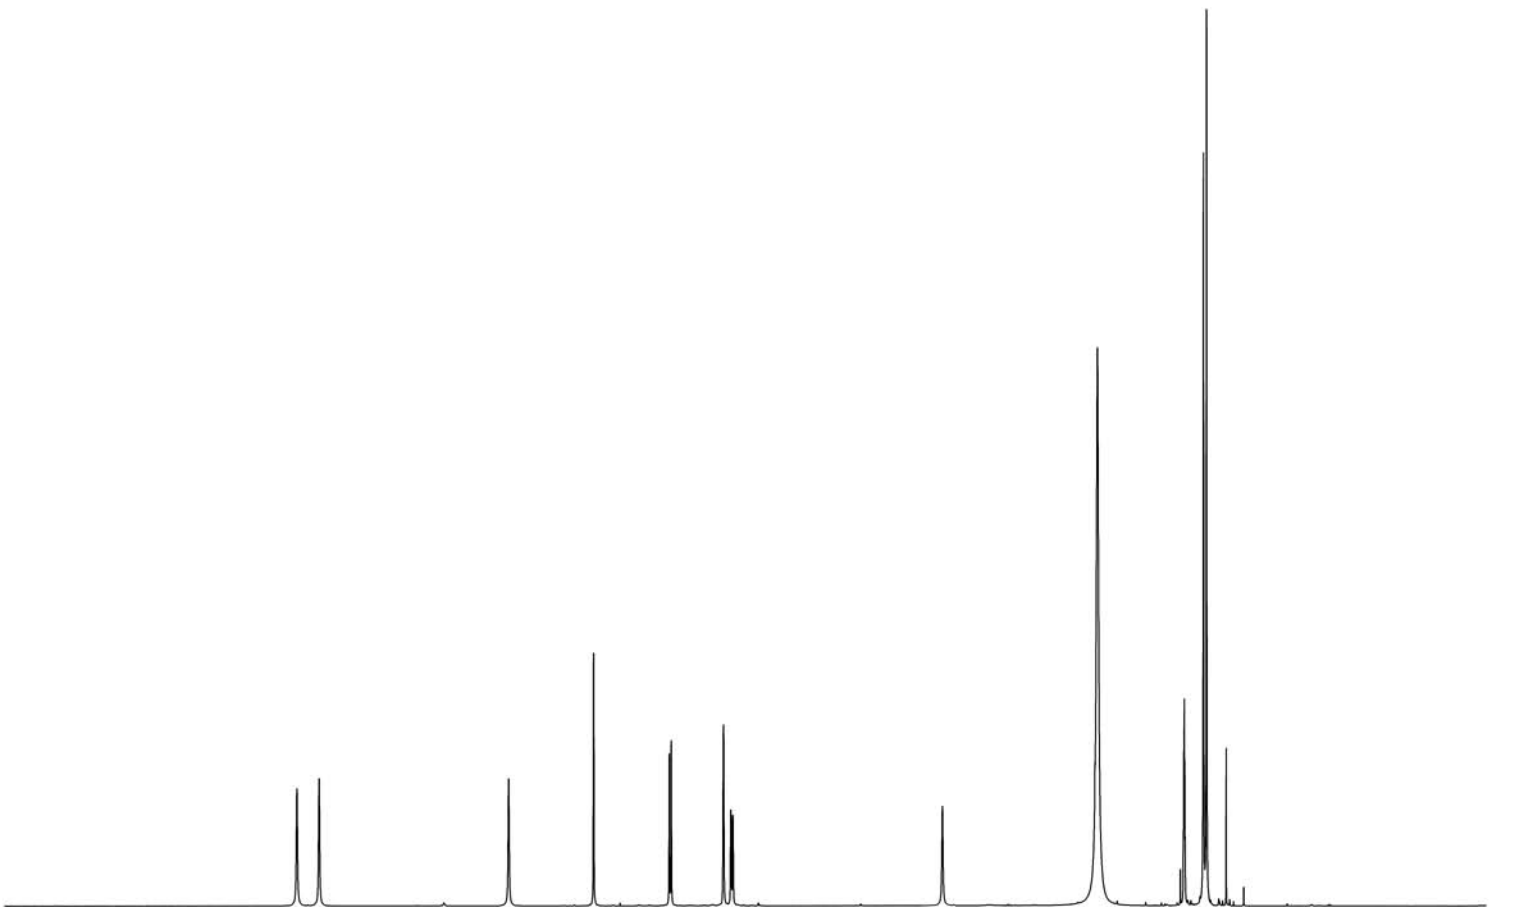

14 13 12 11 10 9 8 7 6 5 4 3 2 1 0 ppm

1.00  
1.00

1.00

1.00

1.02

1.03

1.04

1.00

3.02  
3.06

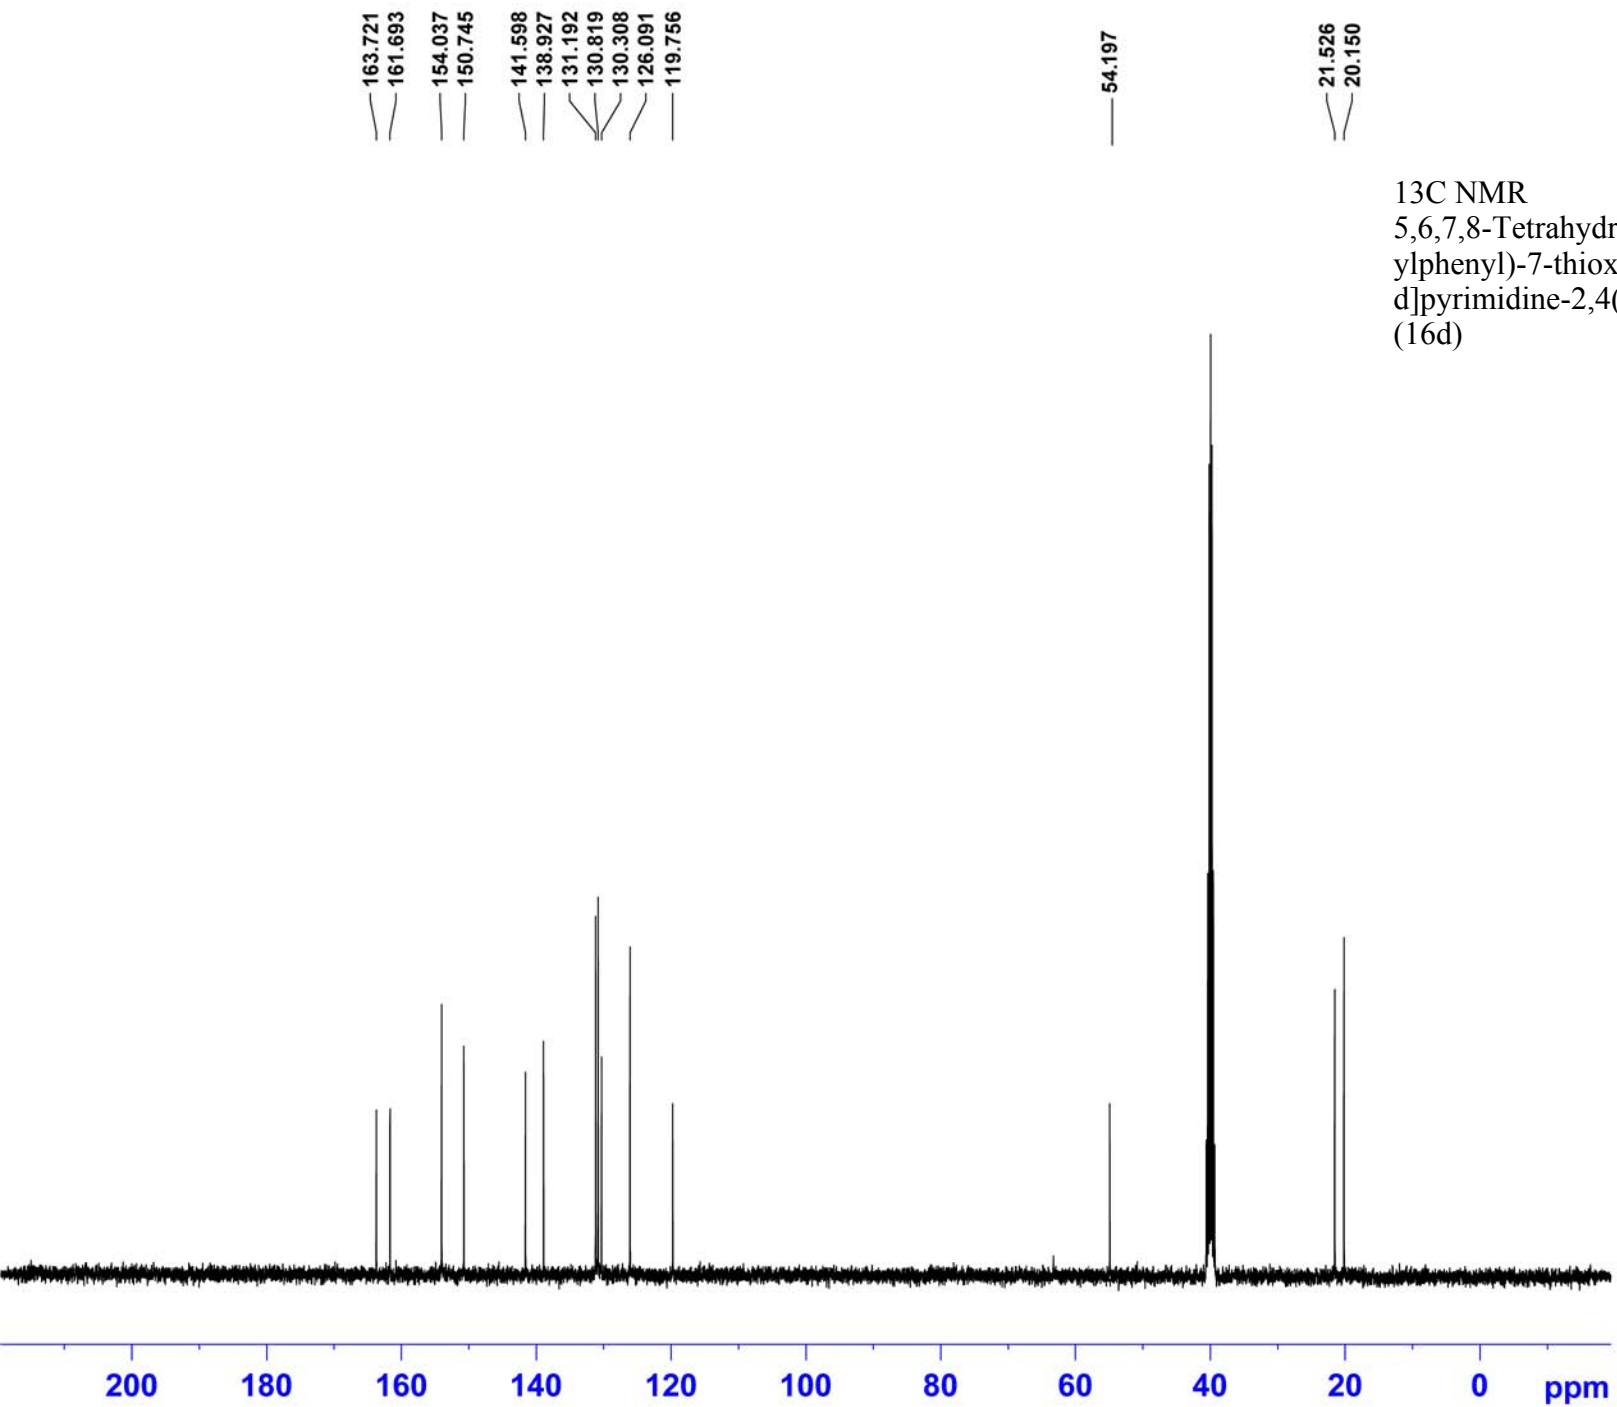

13C NMR  
5,6,7,8-Tetrahydro-5-(2,4-dimethylphenyl)-7-thioxopyrimido[4,5-d]pyrimidine-2,4(1H,3H)-dione (16d)

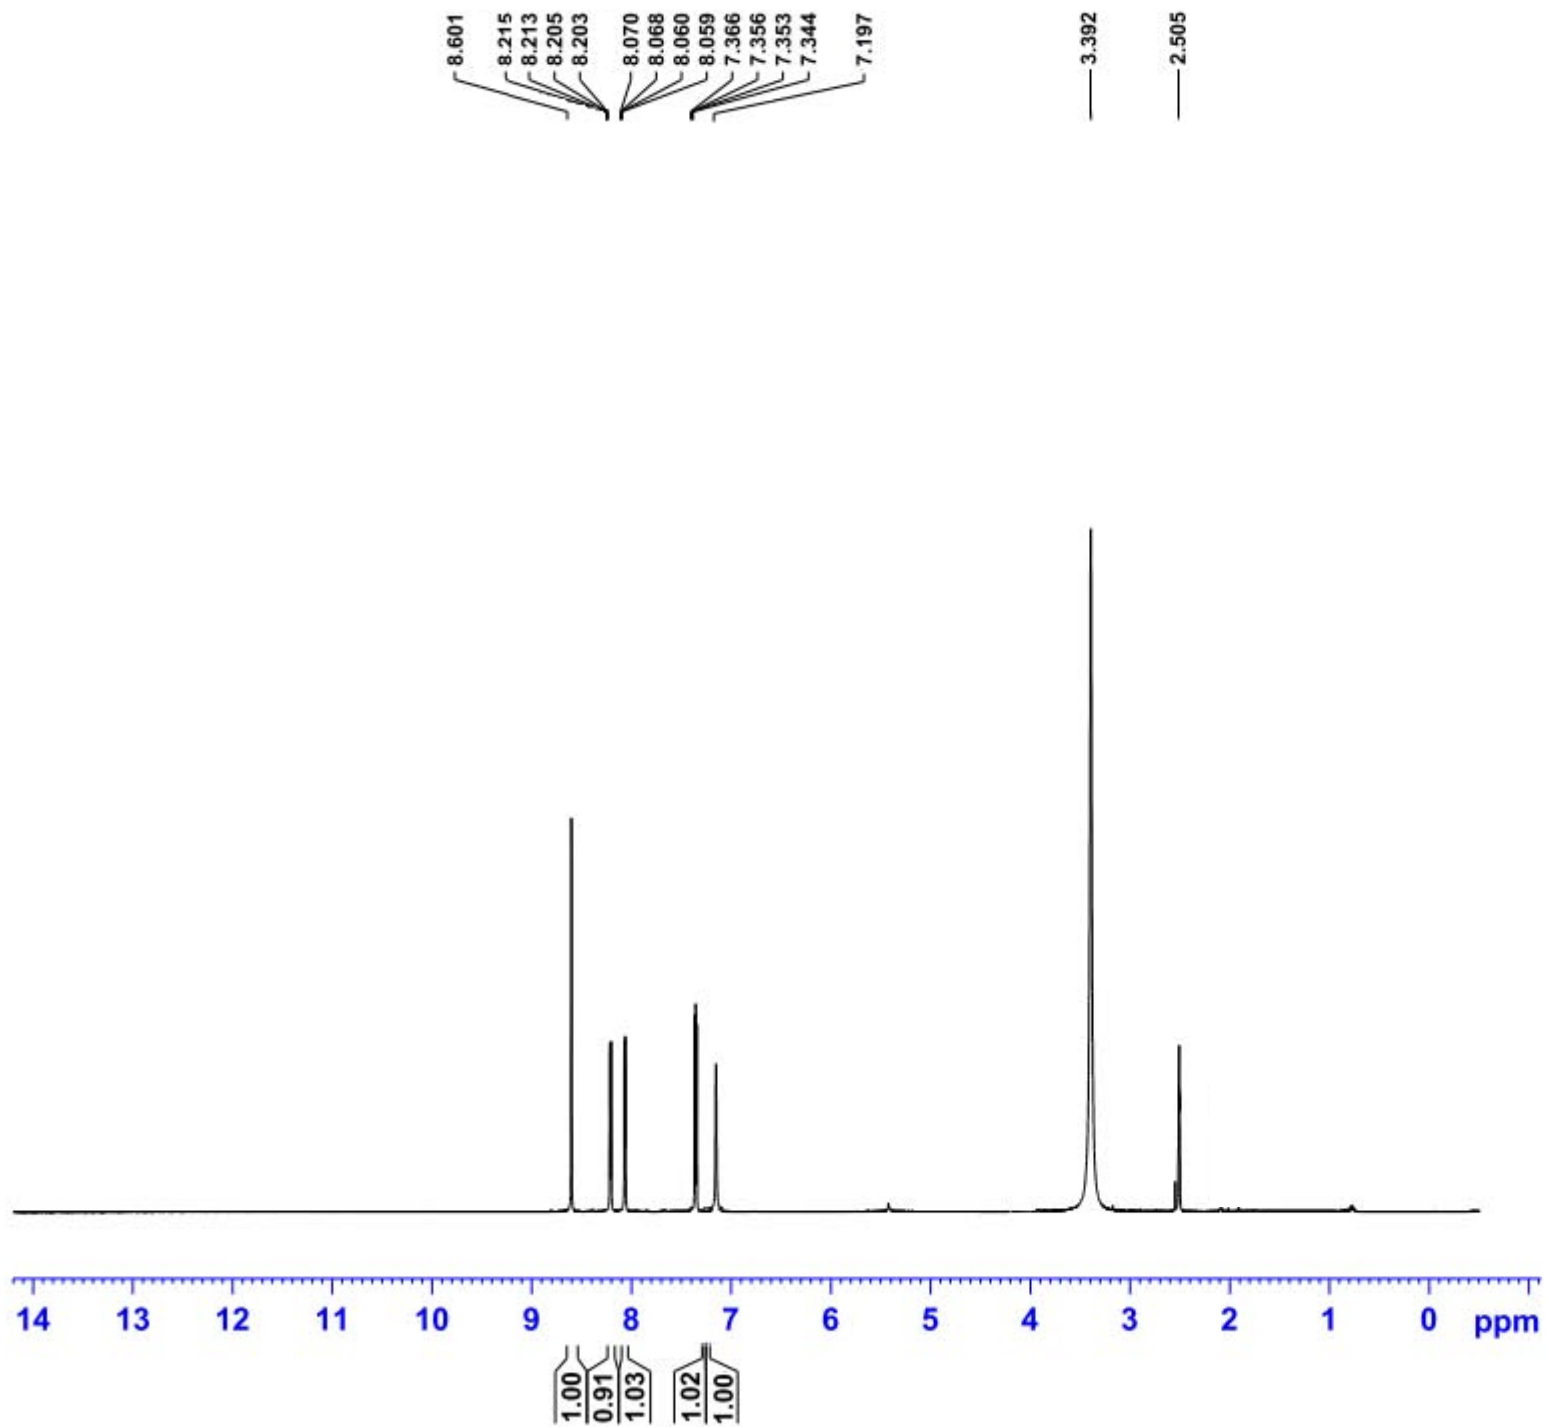

1H NMR  
2,4-Dioxo-6-(thiophen-2-yl)-1,2,3,4-tetrahydropyrimidin-5-carbonitrile (17b)

168.006  
162.611  
148.058  
140.719  
137.608  
135.990  
129.308  
116.266  
98.213

<sup>13</sup>C NMR  
2,4-Dioxo-6-(thiophen-2-yl)-1,2,3,4-tetrahydropyrimidin-5-carbonitrile (17b)

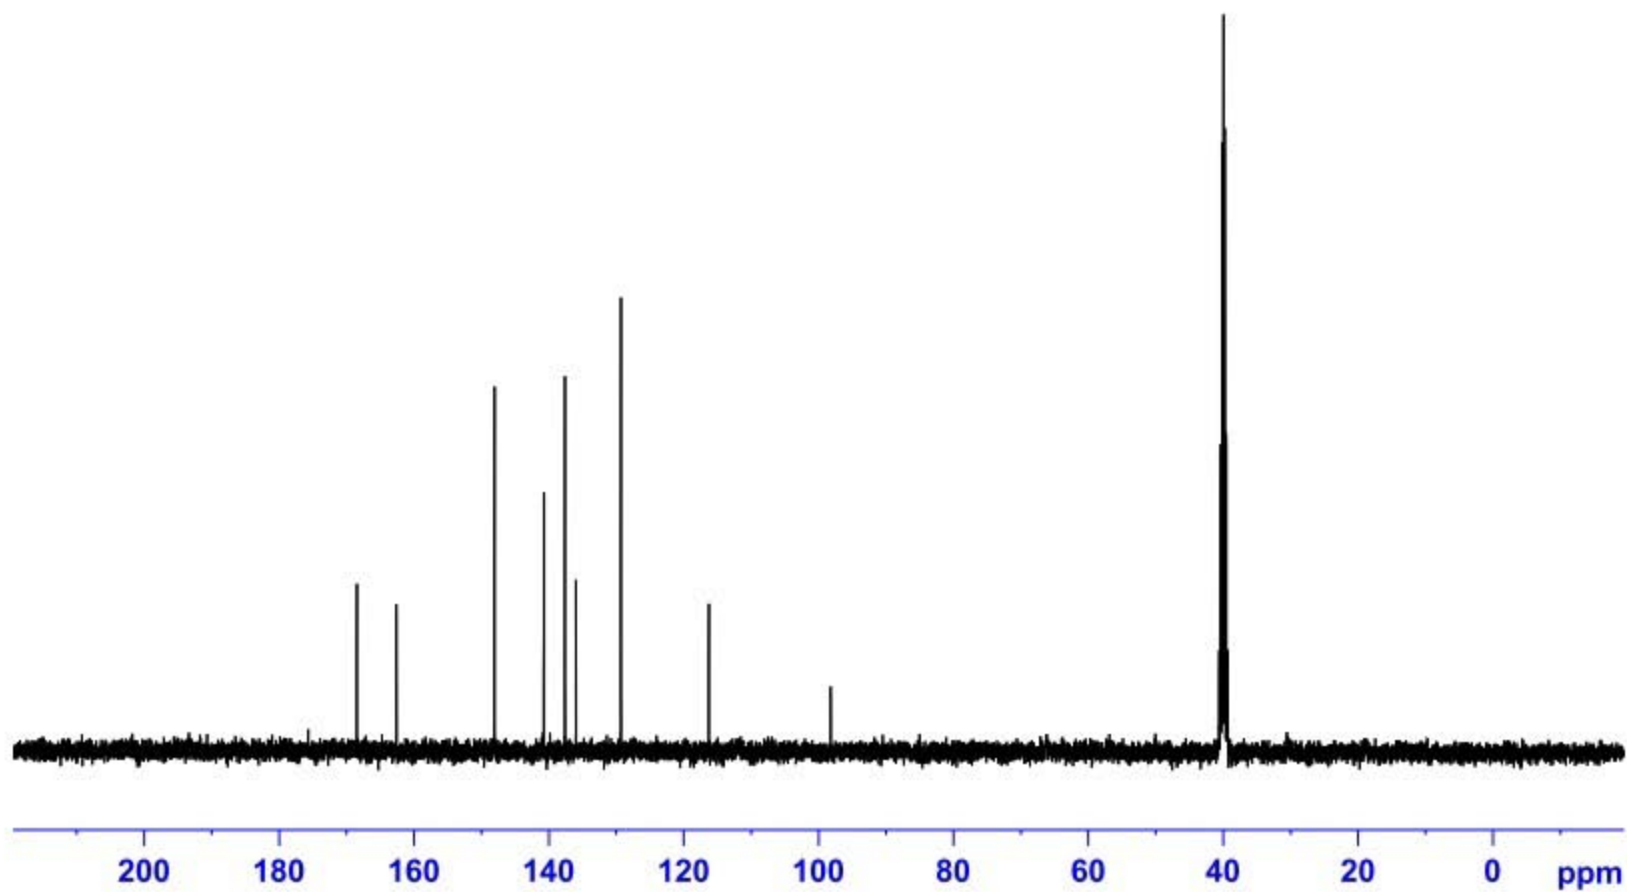

Supplement: c5ra01406a1.pdf [file c5ra01406a1.pdf]
